# Supplementary material for: Intermittent administration of a leucine-deprived diet is able to intervene in type 2 diabetes in db/db mice
Source: PubMed Central journal article supplement (PMC6169254; doi:10.1016/j.heliyon.2018.e00830), 2018-09-27

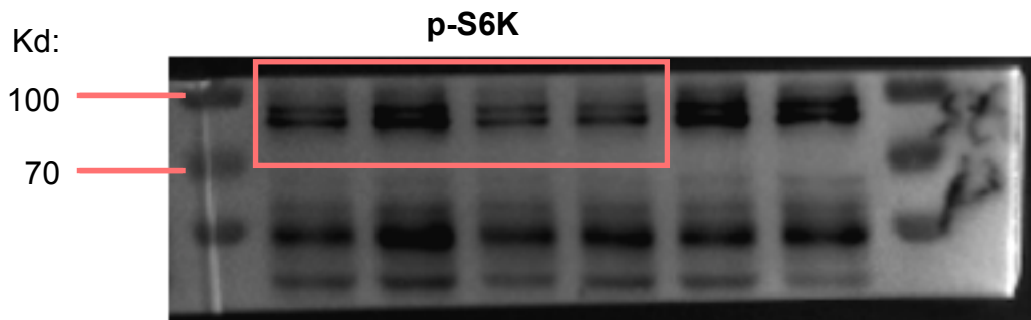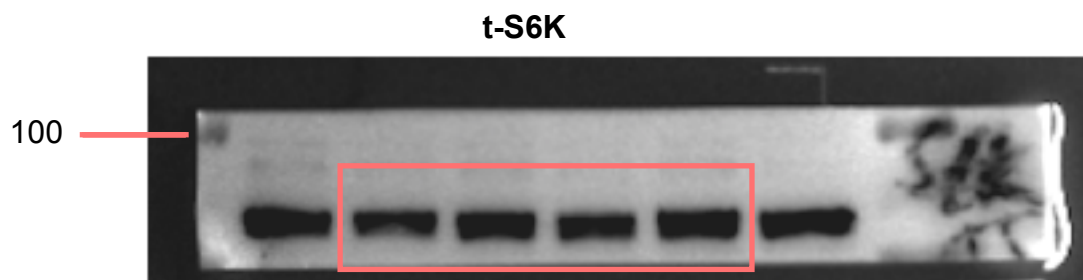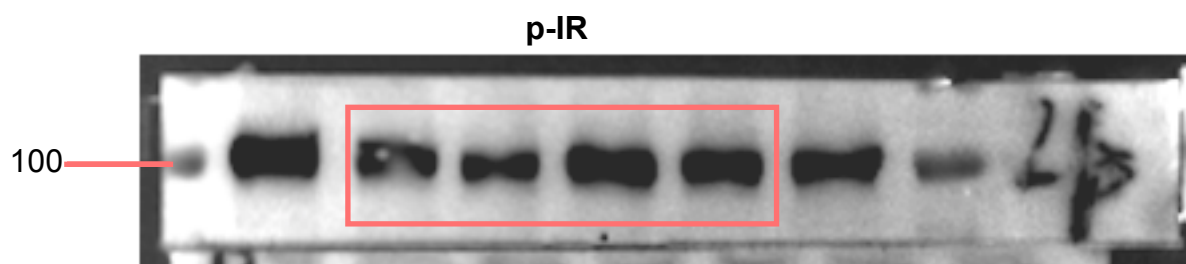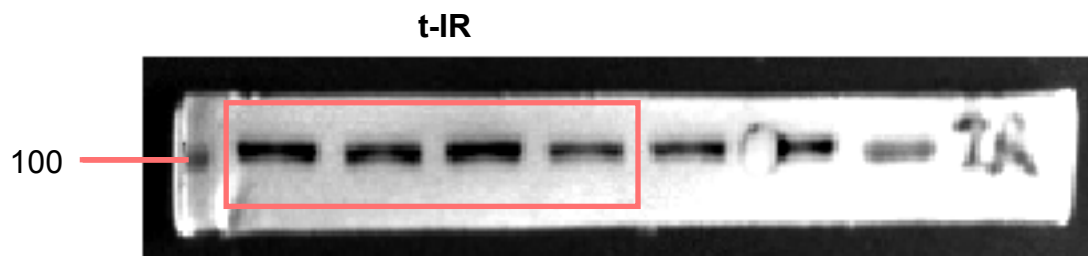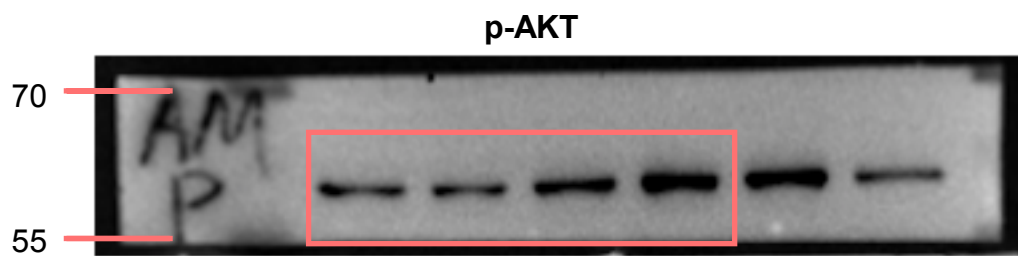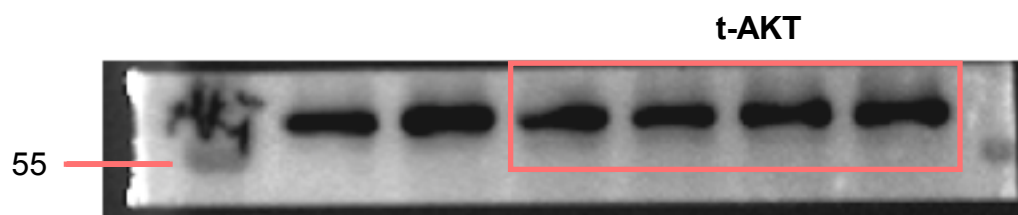

Supplement: mmc1.pdf [file mmc1.pdf]
